# Supplementary material for: Adaptation to Brazilian Portuguese and Latin-American Spanish and psychometric properties of the Mental Illness Clinicians’ Attitudes Scale (MICA v4)
Source: PubMed Central journal article supplement (PMC10164403; doi:10.47626/2237-6089-2021-0291), 2023-03-07
Supplement: 2238-0019-trends-45-e20210291-suppl1.pdf [file 2238-0019-trends-45-e20210291-suppl1.pdf]

## Supplementary Material S1

Page 1

## Mental Illness: Clinicians' Attitudes Scale

## MICA-4

Note to researchers distributing this scale: please only use after reading instructions in "Manual for Researchers".

**Instructions:** for each of questions 1-16, please respond by **ticking one box only**. Mental illness here refers to conditions for which an individual would be seen by a psychiatrist.

|   |                                                                                                                                                    | Strongly agree | Agree | Somewhat agree | Somewhat disagree | Disagree | Strongly disagree |
|---|----------------------------------------------------------------------------------------------------------------------------------------------------|----------------|-------|----------------|-------------------|----------|-------------------|
| 1 | I just learn about mental health when I have to, and would not bother reading additional material on it.                                           |                |       |                |                   |          |                   |
| 2 | People with a severe mental illness can never recover enough to have a good quality of life.                                                       |                |       |                |                   |          |                   |
| 3 | Working in the mental health field is just as respectable as other fields of health and social care.                                               |                |       |                |                   |          |                   |
| 4 | If I had a mental illness, I would never admit this to my <b>friends</b> because I would fear being treated differently.                           |                |       |                |                   |          |                   |
| 5 | People with a severe mental illness are dangerous more often than not.                                                                             |                |       |                |                   |          |                   |
| 6 | Health/social care staff know more about the lives of people treated for a mental illness than do family members or friends.                       |                |       |                |                   |          |                   |
| 7 | If I had a mental illness, I would never admit this to my <b>colleagues</b> for fear of being treated differently.                                 |                |       |                |                   |          |                   |
| 8 | Being a health/social care professional in the area of mental health is <b>not</b> like being a real health/social care professional.              |                |       |                |                   |          |                   |
| 9 | If a senior colleague instructed me to treat people with a mental illness in a disrespectful manner, I would <b>not</b> follow their instructions. |                |       |                |                   |          |                   |

Mental Illness: Clinicians' Attitudes Scale MICA-2 © 2010. Health Service and Population Research Department, Institute of Psychiatry, King's College London. We would like to thank Aliya Kassam for her major contribution to the development of this scale.

Contact: Professor Graham Thornicroft. Email: [graham.thornicroft@kcl.ac.uk](mailto:graham.thornicroft@kcl.ac.uk)

Kassam A., Glozier N., Leese M., Henderson C., Thornicroft G. (2010) Development and responsiveness of a scale to measure clinicians' attitudes to people with mental illness (medical student version). *Acta Psychiatrica Scandinavica* 122(2), 153-161.

**Mental Illness: Clinicians' Attitudes Scale**

**MICA-4**

Note to researchers distributing this scale: please only use after reading instructions in "Manual for Researchers".

**Instructions:** for each of questions 1-16, please respond by ticking one box only. Mental illness here refers to conditions for which an individual would be seen by a psychiatrist.

|           |                                                                                                                                                                            | Strongly agree           | Agree                    | Somewhat agree           | Somewhat disagree        | Disagree                 | Strongly disagree        |
|-----------|----------------------------------------------------------------------------------------------------------------------------------------------------------------------------|--------------------------|--------------------------|--------------------------|--------------------------|--------------------------|--------------------------|
| <b>10</b> | I feel as comfortable talking to a person with a mental illness as I do talking to a person with a physical illness.                                                       | <input type="checkbox"/> | <input type="checkbox"/> | <input type="checkbox"/> | <input type="checkbox"/> | <input type="checkbox"/> | <input type="checkbox"/> |
| <b>11</b> | It is important that any health/social care professional supporting a person with a mental illness also ensures that their physical health is assessed.                    | <input type="checkbox"/> | <input type="checkbox"/> | <input type="checkbox"/> | <input type="checkbox"/> | <input type="checkbox"/> | <input type="checkbox"/> |
| <b>12</b> | The public does <b>not</b> need to be protected from people with a severe mental illness.                                                                                  | <input type="checkbox"/> | <input type="checkbox"/> | <input type="checkbox"/> | <input type="checkbox"/> | <input type="checkbox"/> | <input type="checkbox"/> |
| <b>13</b> | If a person with a mental illness complained of physical symptoms (such as chest pain) I would attribute it to their mental illness.                                       | <input type="checkbox"/> | <input type="checkbox"/> | <input type="checkbox"/> | <input type="checkbox"/> | <input type="checkbox"/> | <input type="checkbox"/> |
| <b>14</b> | General practitioners should <b>not</b> be expected to complete a thorough assessment for people with psychiatric symptoms because they can be referred to a psychiatrist. | <input type="checkbox"/> | <input type="checkbox"/> | <input type="checkbox"/> | <input type="checkbox"/> | <input type="checkbox"/> | <input type="checkbox"/> |
| <b>15</b> | I would use the terms 'crazy', 'nutter', 'mad' etc. to describe to colleagues people with a mental illness who I have seen in my work.                                     | <input type="checkbox"/> | <input type="checkbox"/> | <input type="checkbox"/> | <input type="checkbox"/> | <input type="checkbox"/> | <input type="checkbox"/> |
| <b>16</b> | If a colleague told me they had a mental illness, I would still want to work with them.                                                                                    | <input type="checkbox"/> | <input type="checkbox"/> | <input type="checkbox"/> | <input type="checkbox"/> | <input type="checkbox"/> | <input type="checkbox"/> |

Thank you very much for your help.

Mental illness: Clinicians' Attitudes Scale MICA-2 © 2010. Health Service and Population Research Department, Institute of Psychiatry, King's College London. We would like to thank Aliya Kassam for her major contribution to the development of this scale. Contact: Professor Graham Thornicroft. Email: [graham.thornicroft@kcl.ac.uk](mailto:graham.thornicroft@kcl.ac.uk)

Kassam A., Glozier N., Leese M., Henderson C., Thornicroft G. (2010) Development and responsiveness of a scale to measure clinicians' attitudes to people with mental illness (medical student version). Acta Psychiatrica Scandinavica 122(2), 153-161.
