# Supplementary material for: Adaptation to Brazilian Portuguese and Latin-American Spanish and psychometric properties of the Mental Illness Clinicians’ Attitudes Scale (MICA v4)
Source: PubMed Central journal article supplement (PMC10164403; doi:10.47626/2237-6089-2021-0291), 2023-03-07
Supplement: 2238-0019-trends-45-e20210291-suppl4.pdf [file 2238-0019-trends-45-e20210291-suppl4.pdf]

Adaptation and psychometric properties of the Mental Illness Clinicians' Attitudes Scale (MICA v4) to Brazilian Portuguese and Latin-American Spanish - Vistorte et al.

**Supplementary Material S4****Distribution of the MICA responses comparing Portuguese and Spanish samples**

|                                                                                                                                                                          | Items                  | Strongly Agree | Agree     | Somewhat Agree | Somewhat Disagree | Disagree  | Strongly Disagree | P value ( $\chi^2$ ) |
|--------------------------------------------------------------------------------------------------------------------------------------------------------------------------|------------------------|----------------|-----------|----------------|-------------------|-----------|-------------------|----------------------|
| (1) I just learn about mental health when I have to, and would not bother reading additional material on it.                                                             | 1 (Spanish Sample)     | 85(35.3%)      | 58(24.1%) | 42(17.4%)      | 14(5.8%)          | 22(5.8%)  | 20(8.3%)          | .53                  |
|                                                                                                                                                                          | 1 (Portuguese Sample)  | 57(39%)        | 30(20.5%) | 20(13.7%)      | 17(11.6%)         | 12(8.2%)  | 10(6.8%)          |                      |
| (2) People with a severe mental illness can never recover enough to have a good quality of life.                                                                         | 2 (Spanish Sample)     | 11(4.6%)       | 30(12.4%) | 31(12.9%)      | 38(15.8%)         | 81(33.6%) | 50(20.7%)         | .21                  |
|                                                                                                                                                                          | 2 (Portuguese Sample)  | 5(3.4%)        | 9(6.2%)   | 7(4.8%)        | 20(13.7%)         | 55(37.7%) | 50(34.2%)         |                      |
| (3) Working in the mental health field is just as respectable as other fields of health and social care.                                                                 | 3 (Spanish Sample)     | 229(95%)       | 7(2.9%)   | 5(2.1%)        | -                 | -         | -                 | .27                  |
|                                                                                                                                                                          | 3 (Portuguese Sample)  | 129(88.4%)     | 3(2.1%)   | 10(6.8%)       | 2(1.4%)           | -         | 2(1.4%)           |                      |
| (4) If I had a mental illness, I would never admit this to my friends because I would fear being treated differently.                                                    | 4 (Spanish Sample)     | 9(3.7%)        | 15(6.2%)  | 13(5.4%)       | 20(8.3%)          | 83(34.4%) | 101(41.9%)        | .85                  |
|                                                                                                                                                                          | 4 (Portuguese Sample)  | 3(2.1%)        | 13(8.9%)  | 13(5.4%)       | 22(15.1%)         | 43(29.5%) | 59(40.4%)         |                      |
| (5) People with a severe mental illness are dangerous more often than not.                                                                                               | 5 (Spanish Sample)     | 19(7.9%)       | 41(17%)   | 44(18.3%)      | 47(19.5%)         | 57(23.7%) | 33(13.7%)         | .03                  |
|                                                                                                                                                                          | 5 (Portuguese Sample)  | 7(4.2%)        | 22(15.1%) | 7(4.8%)        | 36(24.7%)         | 50(34.2%) | 24(16.4%)         |                      |
| (6) Health/social care staff know more about the lives of people treated for a mental illness than do family members or friends.                                         | 6 (Spanish Sample)     | 30(12.4%)      | 52(21.6%) | 53(22%)        | 39(16.2%)         | 51(21.2%) | 16(6.6%)          | .16                  |
|                                                                                                                                                                          | 6 (Portuguese Sample)  | 12(8.2%)       | 39(26.7%) | 21(14.4%)      | 39(26.7%)         | 23(15.8%) | 12(8.2%)          |                      |
| (7) If I had a mental illness, I would never admit this to my colleagues for fear of being treated differently.                                                          | 7 (Spanish Sample)     | 9(3.7%)        | 15(6.2%)  | 22(9.1%)       | 25(10.4%)         | 94(39%)   | 76(31.5%)         | .01                  |
|                                                                                                                                                                          | 7 (Portuguese Sample)  | 5(3.4%)        | 15(10.3%) | 14(9.6%)       | 33(22.6%)         | 53(36.3%) | 26(17.8%)         |                      |
| (8) Being a health/social care professional in the area of mental health is not like being a real health/social care professional.                                       | 8 (Spanish Sample)     | 6(2.5%)        | 5(2.1%)   | 5(2.1%)        | 3(1.2%)           | 60(24.9%) | 162(67.2%)        | .31                  |
|                                                                                                                                                                          | 8 (Portuguese Sample)  | 3(2.1%)        | -         | 4(2.7%)        | 5(3.4%)           | 29(19.9%) | 105(71.9%)        |                      |
| (9) If a senior colleague instructed me to treat people with a mental illness in a disrespectful manner, I would not follow their instructions.                          | 9 (Spanish Sample)     | 187(77.6%)     | 14(5.8%)  | 11(4.6%)       | 4(1.7%)           | 7(2.9%)   | 18(7.5%)          | .30                  |
|                                                                                                                                                                          | 9 (Portuguese Sample)  | 111(76%)       | 3(2.1%)   | 17(11.6%)      | 3(2.1%)           | 2(1.4%)   | 10(6.8%)          |                      |
| (10) I feel as comfortable talking to a person with a mental illness as I do talking to a person with a physical illness.                                                | 10 (Spanish Sample)    | 123(51%)       | 63(26.1%) | 23(9.5%)       | 7(2.9%)           | 23(9.5%)  | 2(0.8%)           | .14                  |
|                                                                                                                                                                          | 10 (Portuguese Sample) | 73(50%)        | 35(24%)   | 21(14.4%)      | 9(6.2%)           | 7(4.8%)   | 1(0.7%)           |                      |
| (11) It is important that any health/social care professional supporting a person with a mental illness also ensures that their physical health is assessed.             | 11 (Spanish Sample)    | 190(78.8%)     | 36(14.9%) | 11(4.6%)       | 2(0.8%)           | -         | 2(0.8%)           | .01                  |
|                                                                                                                                                                          | 11 (Portuguese Sample) | 122(83.6%)     | 3(2.1%)   | 16(11%)        | 2(1.4%)           | 2(1.4%)   | 1(0.7%)           |                      |
| (12) The public does not need to be protected from people with a severe mental illness.                                                                                  | 12 (Spanish Sample)    | 60(24.9%)      | 48(19.9%) | 31(12.9%)      | 63(26.1%)         | 28(11.6%) | 11(4.6%)          | .43                  |
|                                                                                                                                                                          | 12 (Portuguese Sample) | 28(19.2%)      | 39(26.7%) | 19(13%)        | 36(24.7%)         | 19(13%)   | 5(3.4%)           |                      |
| (13) If a person with a mental illness complained of physical symptoms (such as chest pain) I would attribute it to their mental illness.                                | 13 (Spanish Sample)    | 2(0.8%)        | 6(2.5%)   | 10(4.1%)       | 36(14.9%)         | 89(36.9%) | 98(40.7%)         | .02                  |
|                                                                                                                                                                          | 13 (Portuguese Sample) | -              | 7(4.8%)   | 1(0.7%)        | 31(21.2%)         | 61(41.8%) | 46(31.5%)         |                      |
| (14) General practitioners should not be expected to complete a thorough assessment for people with psychiatric symptoms because they can be referred to a psychiatrist. | 14 (Spanish Sample)    | 15(6.2%)       | 11(4.6%)  | 20(8.3%)       | 35(14.5%)         | 88(36.5%) | 72(29.9%)         | .16                  |
|                                                                                                                                                                          | 14 (Portuguese Sample) | 4(2.7%)        | 14(9.6%)  | 5(3.4%)        | 28(19.2%)         | 44(30.1%) | 51(34.9%)         |                      |
| (15) I would use the terms 'crazy', 'nutter', 'mad' etc. to describe to colleagues people with a mental illness who I have seen in my work.                              | 15 (Spanish Sample)    | 1(0.4%)        | 1(0.4%)   | 1(0.4%)        | 2(0.8%)           | 47(19.5%) | 189(78.4%)        | .25                  |
|                                                                                                                                                                          | 15 (Portuguese Sample) | 1(0.7%)        | 3(2.1%)   | 2(1.4%)        | 8(5.5%)           | 30(20.5%) | 102(69.9%)        |                      |
| (16) If a colleague told me they had a mental illness, I would still want to work with them.                                                                             | 16 (Spanish Sample)    | 135(56%)       | 75(31.1%) | 24(10%)        | 2(0.8%)           | 2(0.8%)   | 3(1.2%)           | .01                  |
|                                                                                                                                                                          | 16 (Portuguese Sample) | 97(66.4%)      | 12(8.2%)  | 36(24.7%)      | 1(0.7%)           | -         | -                 |                      |
