# Supplementary material for: Adaptation to Brazilian Portuguese and Latin-American Spanish and psychometric properties of the Mental Illness Clinicians’ Attitudes Scale (MICA v4)
Source: Trends Psychiatry Psychother. 2023 Mar 7;45:e20210291. doi: 10.47626/2237-6089-2021-0291 (PMC10164403; doi:10.47626/2237-6089-2021-0291)
Supplement: Supplementary file 2 [file 2238-0019-trends-45-e20210291-suppl2.pdf]

## Supplementary Material S2

Página 1

## Trastorno Mental: Escala de actitudes de los médicos.

**MICA**

Nota a los investigadores que distribuyen esta escala: Por favor, utilice solo después de leer las instrucciones en el "Manual del Investigador".

Instrucciones: Por cada una de las preguntas del número 1 a la 16, por favor responda marcando una sola casilla. La enfermedad mental se refiere aquí a las condiciones por las cuales un individuo sería visto por un psiquiatra.

|                                                                                                                                                                               | Totalmente de acuerdo    | De acuerdo               | Algo de acuerdo          | Algo en desacuerdo       | En desacuerdo            | Totalmente en desacuerdo |
|-------------------------------------------------------------------------------------------------------------------------------------------------------------------------------|--------------------------|--------------------------|--------------------------|--------------------------|--------------------------|--------------------------|
| <b>1</b> Solo estudio sobre enfermedades mentales cuando tengo que hacerlo, y no me molestaría leer material adicional sobre esto.                                            | <input type="checkbox"/> |
| <b>2</b> Las personas con trastornos mentales graves nunca pueden recuperarse completamente para tener una buena calidad de vida.                                             | <input type="checkbox"/> |
| <b>3</b> Trabajar en el campo de la salud mental es tan respetable como trabajar en otros campos de la salud y de la atención social.                                         | <input type="checkbox"/> |
| <b>4</b> Si yo tuviera o padeciera una enfermedad mental nunca se lo haría saber a mis amigos porque tendría miedo de ser tratado de una forma diferente.                     | <input type="checkbox"/> |
| <b>5</b> Las personas con trastornos mentales graves son más peligrosas que otras que no la tienen.                                                                           | <input type="checkbox"/> |
| <b>6</b> El personal de la salud y de asistencia social conocen más sobre la vida de las personas tratadas por una enfermedad mental que los miembros de su familia y amigos. | <input type="checkbox"/> |
| <b>7</b> Si yo padeciera una enfermedad mental nunca lo admitiría a mis colegas porque tendría miedo de ser tratado de una forma diferente.                                   | <input type="checkbox"/> |
| <b>8</b> Ser un profesional de la asistencia social en la salud mental no es ser un verdadero profesional de la asistencia social en la salud.                                | <input type="checkbox"/> |
| <b>9</b> Si un colega con mucha experiencia me instruye a tratar a las personas con una enfermedad mental de una manera irrespetuosa, no seguiría sus instrucciones.          | <input type="checkbox"/> |

**Trastorno Mental: Escala de actitudes de los médicos.****MICA**

Nota a los investigadores que distribuyen esta escala: Por favor, utilice solo después de leer las instrucciones en el "Manual del Investigador".

Instrucciones: Por cada una de las preguntas del número 1 a la 16, por favor responda marcando una sola casilla. La enfermedad mental se refiere aquí a las condiciones por las cuales un individuo sería visto por un psiquiatra.

|                                                                                                                                                                                   | Totalmente de acuerdo    | De acuerdo               | Algo de acuerdo          | Algo en desacuerdo       | En desacuerdo            | Totalmente en desacuerdo |
|-----------------------------------------------------------------------------------------------------------------------------------------------------------------------------------|--------------------------|--------------------------|--------------------------|--------------------------|--------------------------|--------------------------|
| <b>10</b> Me siento cómodo lo mismo hablando con una persona con un trastorno mental como hablando con una persona con una enfermedad física.                                     | <input type="checkbox"/> |
| <b>11</b> Es importante que todo profesional de la salud y asistencia social cuidando de una persona con una enfermedad mental se asegure de que su salud física sea evaluada.    | <input type="checkbox"/> |
| <b>12</b> La población no necesita ser protegida de las personas con una enfermedad mental grave.                                                                                 | <input type="checkbox"/> |
| <b>13</b> Si una persona con una enfermedad mental se queja de síntomas físicos (como dolor en el pecho) se lo atribuiría a su enfermedad mental.                                 | <input type="checkbox"/> |
| <b>14</b> Los médicos generales no deberían esperar a completar una evaluación exhaustiva de las personas con síntomas psiquiátricos porque pueden referirlos para un psiquiatra. | <input type="checkbox"/> |
| <b>15</b> Yo usaría los términos "loco", "chiflado" etc. para describir con mis colegas a las personas con una enfermedad mental que veo (trato) en mi trabajo.                   | <input type="checkbox"/> |
| <b>16</b> Si un colega me dice que tiene una enfermedad mental, me gustaría continuar trabajando con él.                                                                          | <input type="checkbox"/> |

Mental Illness: Clinicians' Attitudes Scale MICA-2 © 2010 Health Service and Population Research Department, Institute of Psychiatry, King's College London. We would like to thank Aliya Kassam for her major contribution to the development of this scale. Contact: Professor Graham Thornicroft. Email: [graham.thornicroft@kcl.ac.uk](mailto:graham.thornicroft@kcl.ac.uk)

Kassam A., Glozier N., Leese M., Henderson C., Thornicroft G. (2010) Development and responsiveness of a scale to measure clinicians' attitudes to people with mental illness (medical student version). *Acta Psychiatrica Scandinavica* 122(2), 153-161.
